# Supplementary material
Source: PubMed Central journal article supplement (PMC5382131)
Supplement: NIHMS819618-supplement-Supplementary___Appendix__online_only_material__etc___1.pdf [file NIHMS819618-supplement-Supplementary___Appendix__online_only_material__etc___1.pdf]

**Figure S1.** Relationship between the polygenic risk score (PRS) and positive family history of breast cancer.



Odds ratio for family history per unit standard deviation of PRS 1.29 [1.01-1.65].

Odds ratio for family history per unit standard deviation of PRS 1.17 [1.12-1.21].
